# Supplementary material for: Elevated virulence of an emerging viral genotype as a driver of honeybee loss
Source: PubMed Central journal article supplement (PMC4936039; doi:10.1098/rspb.2016.0811), 2016-06-29
Supplement: rspb20160811supp1.pdf [file rspb20160811supp1.pdf]

## **Supporting Information**

Elevated virulence of an emerging viral genotype as a driver of honeybee loss

Dino P. McMahon, Myrsini E. Natsopoulou, Vincent Doublet, Matthias Fürst, Silvio Weging, Mark J. F. Brown, Andreas Gogol-Döring, Robert J. Paxton

### **Contents**

- Supplementary Methods
- Supplementary Figures
- Supplementary Tables

### **Supplementary Methods: Characterization of experimental inocula via ultra-deep sequencing.**

After mapping reads to contigs using Bowtie2 [1], we used NCBI Blast (megablast) [2] to search for similarities between the contigs and the NCBI nucleotide collection (nt, version from November 20<sup>th</sup> 2014, downloaded from <ftp://ftp.ncbi.nlm.nih.gov/blast/db>). Most contigs matched nucleotide sequences originating from *Apis mellifera* spp., so we assigned the corresponding sequencing reads to *A. mellifera*. Other contigs represented the bee viruses DWV-A or -B. Reads that mapped equally well to both viruses were counted as either DWV-A or -B in the same proportion as the reads that could be uniquely assigned to either DWV-A or -B; this is an unbiased approach because, though sequence similarity of DWV-A and -B varies across the length of the genome (Fig. S1), reads that could be mapped to both variants were spread evenly across the consensus genome in proportion to sequence similarity of the DWV genotypes A and B (Fig. S1). Some contigs were identified as the bacteriophage phiX, which is widely used for Illumina sequencing control libraries, so we assume that these reads are technical artefacts. A manual inspection of the Blast results revealed that the remaining contigs contained either very unspecific sequences or were assigned to database entries clearly unrelated to *A. mellifera*. All reads either corresponding to these unspecific or unrelated contigs, or to contigs which could not be found in the NCBI nucleotide collection, together with all reads which could not be mapped to any contig, were further processed as follows. After filtering out low-complexity sequences with PRINSEQ [3] (threshold 15 for ‘dust’ and 85 for ‘entropy’), reads were mapped with Bowtie2 to the NCBI virus database [4]. No bee-related virus other than the viruses mentioned above could be found this way. Then

we mapped all remaining reads one by one to the NCBI nucleotide collection using blastn [5]. In this way, we sorted these reads into the classes described before, but we could not identify any further bee-related or bee-associated organism. At the end, only 47,587 (0.23%) reads from the B inoculum and 12,434 (0.064%) reads from the A inoculum remained unassigned. Both inoculum libraries were sequenced on the same multiplexed Illumina flow cell lane, so a small fraction of sequencing reads is expected to be accidentally assigned to the wrong data set, e.g. because of errors during barcode sequencing or due to chimeric reads. This could explain the very low occurrence of DWV-B in the A inoculum data set and also a part of the few DWV-A reads in the B inoculum data set. We also compared the average variability of each inoculum by calculating the proportion of nucleotide mismatches, insertions and deletions between the reads and the respective consensus genome sequences. Average mutation frequencies were calculated inside of non-overlapping 100 base pair windows (Fig. S1). Sequencing errors were avoided by conducting a restricted analysis using only identical overlapping paired-end read portions. The detected levels of variability were very low and similar for both the A and B inocula (~0.04%).

Finally, we analyzed reads from a third library prepared from RNA extracted from cage experiment-derived honeybees (N=5 pooled 9d p.i. M-treated honeybees, in total 23,546,472 reads) in order to search for the presence of a recently characterized genotype of DWV: DWV-C [6]. Reads were concordantly mapped using Bowtie2 to a single index containing the genomes of DWV-A/Kakugo virus (accession numbers NC\_004830.2 and NC\_005876.1 respectively), DWV-B (NC\_006494.1) and DWV-C (gi|873406561|emb|CEND01000001.1) allowing for multiple hits. All reads that mapped to DWV-C also mapped to one of the other reference genomes with the same

or better alignment score, so we concluded that DWV-C was not present in the experimental inocula.

## SI References

1. Langmead, B. & Salzberg, S.L. Fast gapped-read alignment with Bowtie 2. *Nat Methods* **9**, 357-359 (2012)
2. McGinnis, S. & Madden T.L. BLAST: at the core of a powerful and diverse set of sequence analysis tools. *Nucleic Acids Res* **32**, W20-25 (2004).
3. Schmieder, R. & Edwards, R. Quality control and preprocessing of metagenomic datasets. *Bioinformatics* **27**, 863-864 (2011).
4. Bao, Y. *et al.* National center for biotechnology information viral genomes project. *J Virol* **78**, 7291-7298 (2004).
5. Altschul, S. F., Gish, M., Miller, W., Myers, E. W. & Lipman, D. J. Basic local alignment search tool. *J Mol Biol* **215**, 403-410 (1990).
6. Mordecai, G. J., Wilfert, L., Martin, S. J., Jones, I. M., Schroeder, D. C. Diversity in a honey bee pathogen: first report of a third master variant of Deformed wing virus quasispecies. *ISME J.* Early view (2015).

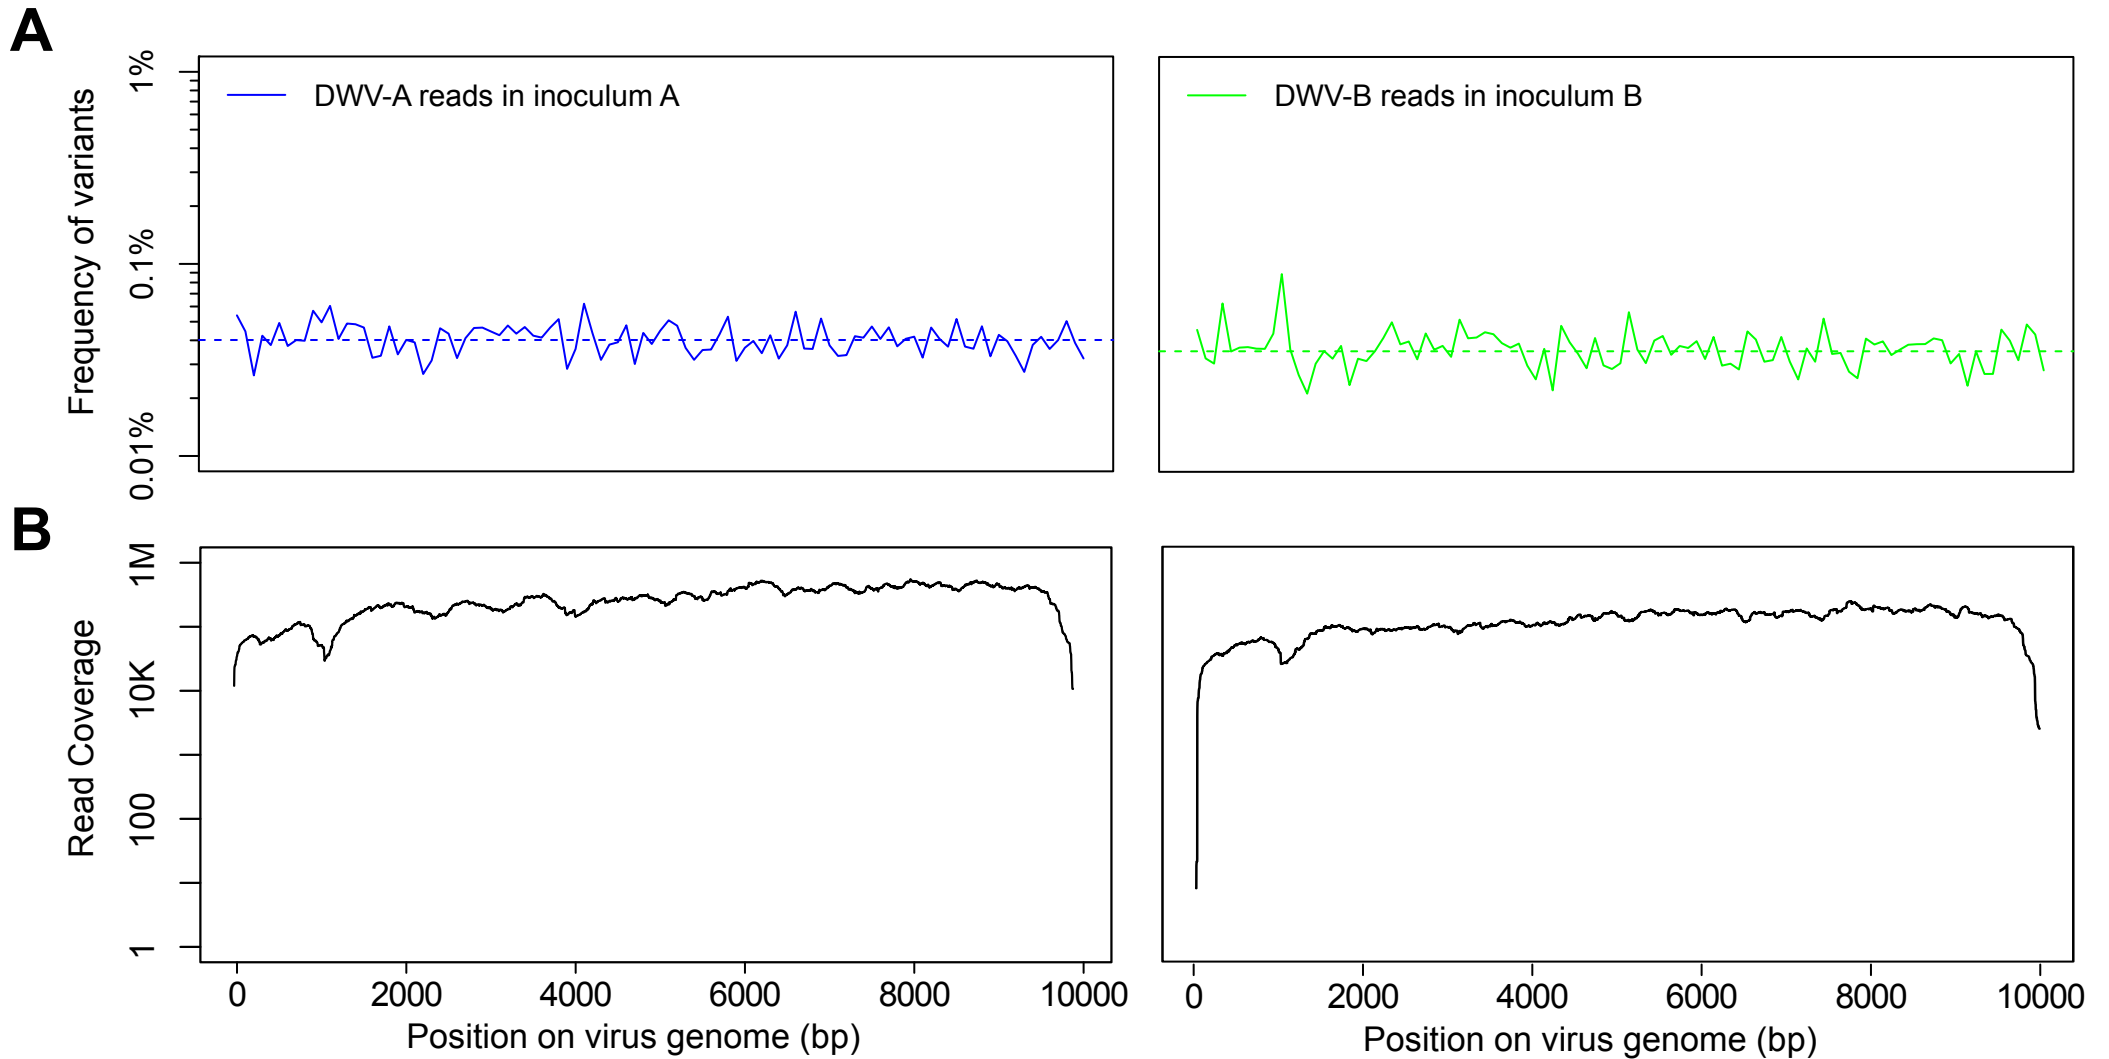

**Fig. S1.** Genetic variability and read coverage of the experimental inocula. **(A)** Average genome-wide variability of DWV-A in the A inoculum, and DWV-B in the B inoculum respectively. These represent nucleotide mismatches, insertions and deletions between DWV-A or -B reads when matched against their respective consensus genome sequences. Mutational variation around each isolate (DWV-A or -B) derived from field-infected bees was <1% whereas sequence divergence between isolates was >15% (Fig. S2), indicating that the two viral genotypes do not form an interconnected mutant cloud. **(B)** Genome-wide coverage of DWV-A and DWV-B reads in A and B inocula, respectively.

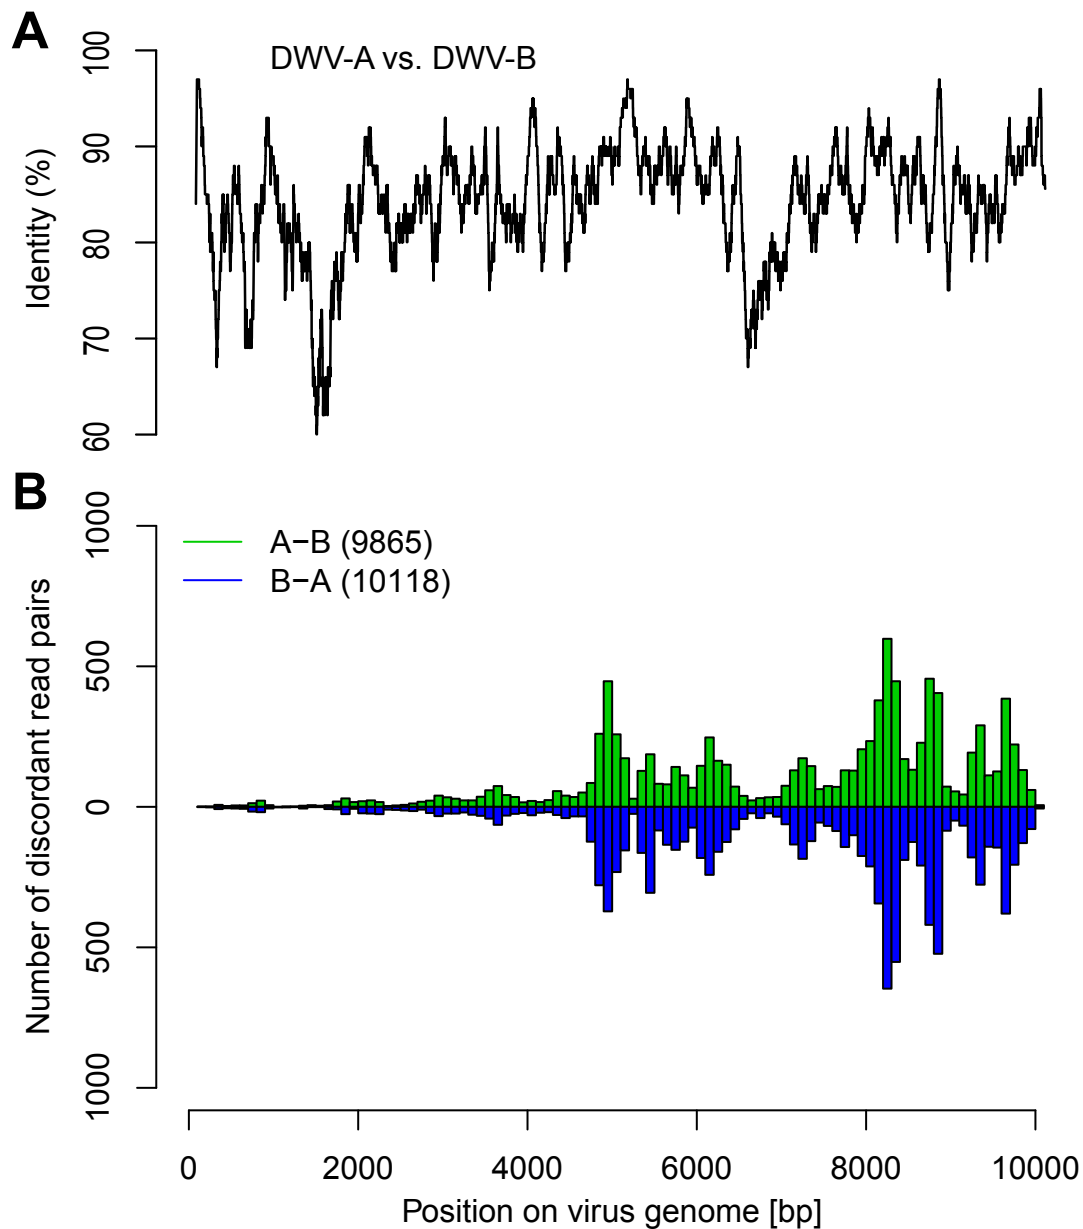

**Fig. S2.** Genome-wide sequence similarity and extent of recombination between DWV-A and -B. **(A)** Genome-wide sequence similarity of DWV-A and -B (derived from consensus sequences of experimental inocula) in a 100bp sliding window. **(B)** Genome-wide rate of recombination between DWV-A and -B genomes as inferred by number of DWV-A and -B discordant read-pairs from pooled M-treated individuals 9d p.i. (N=5). The length of each bar in the histogram corresponds to the number of discordant read pairs whose centers fall into a 100bp window of the virus genome. The green bars give the number of recombinants with a DWV-A to -B fusion; the blue bars give the number of recombinants with a DWV-B to -A fusion.

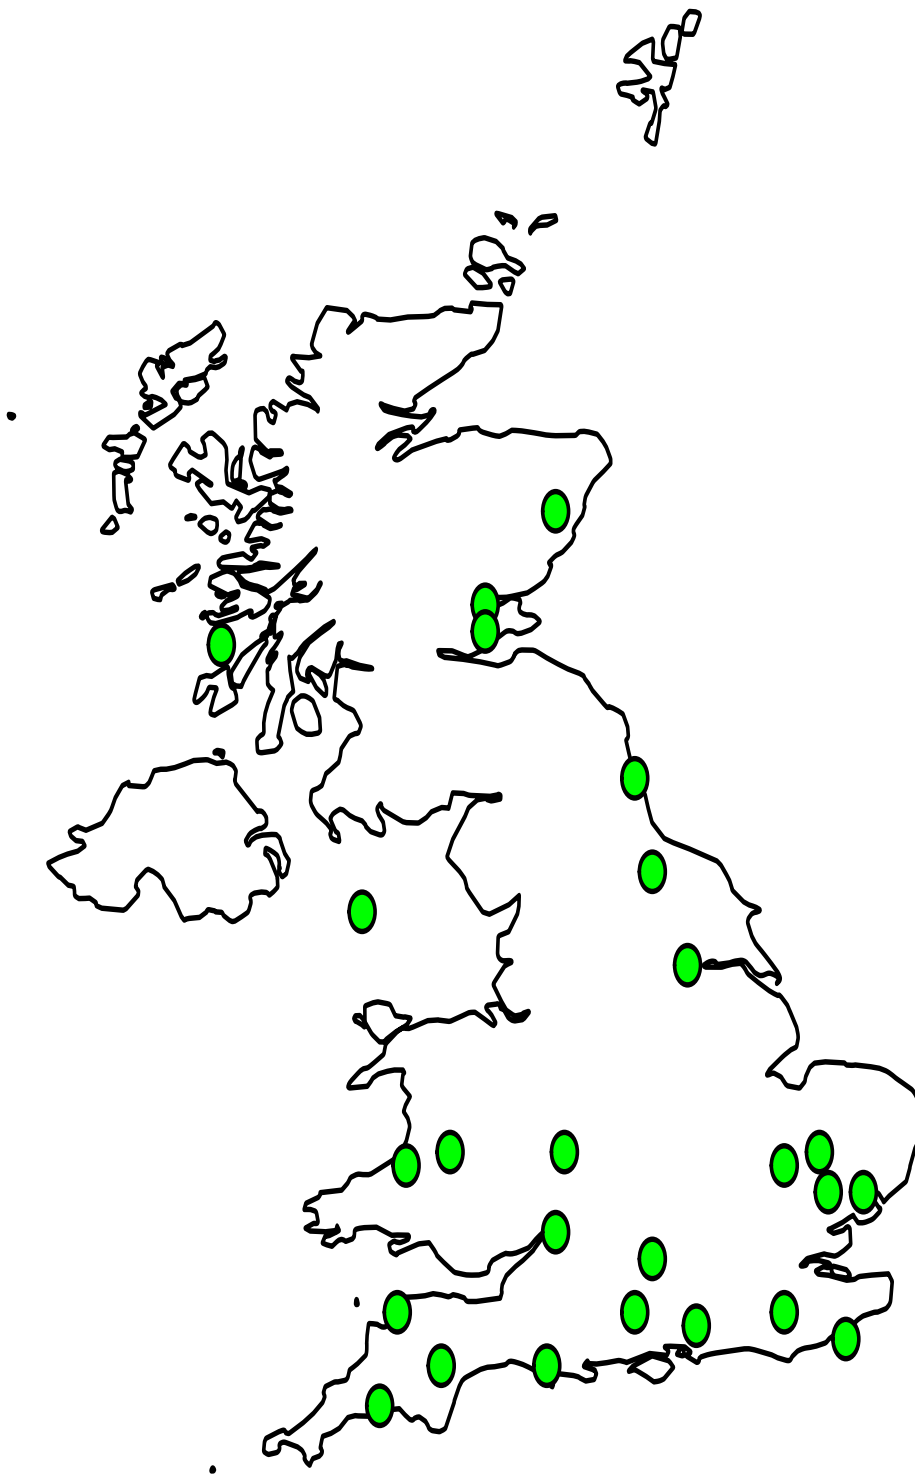

**Fig. S3.** Location of sampling sites used in the GB survey [20,41].

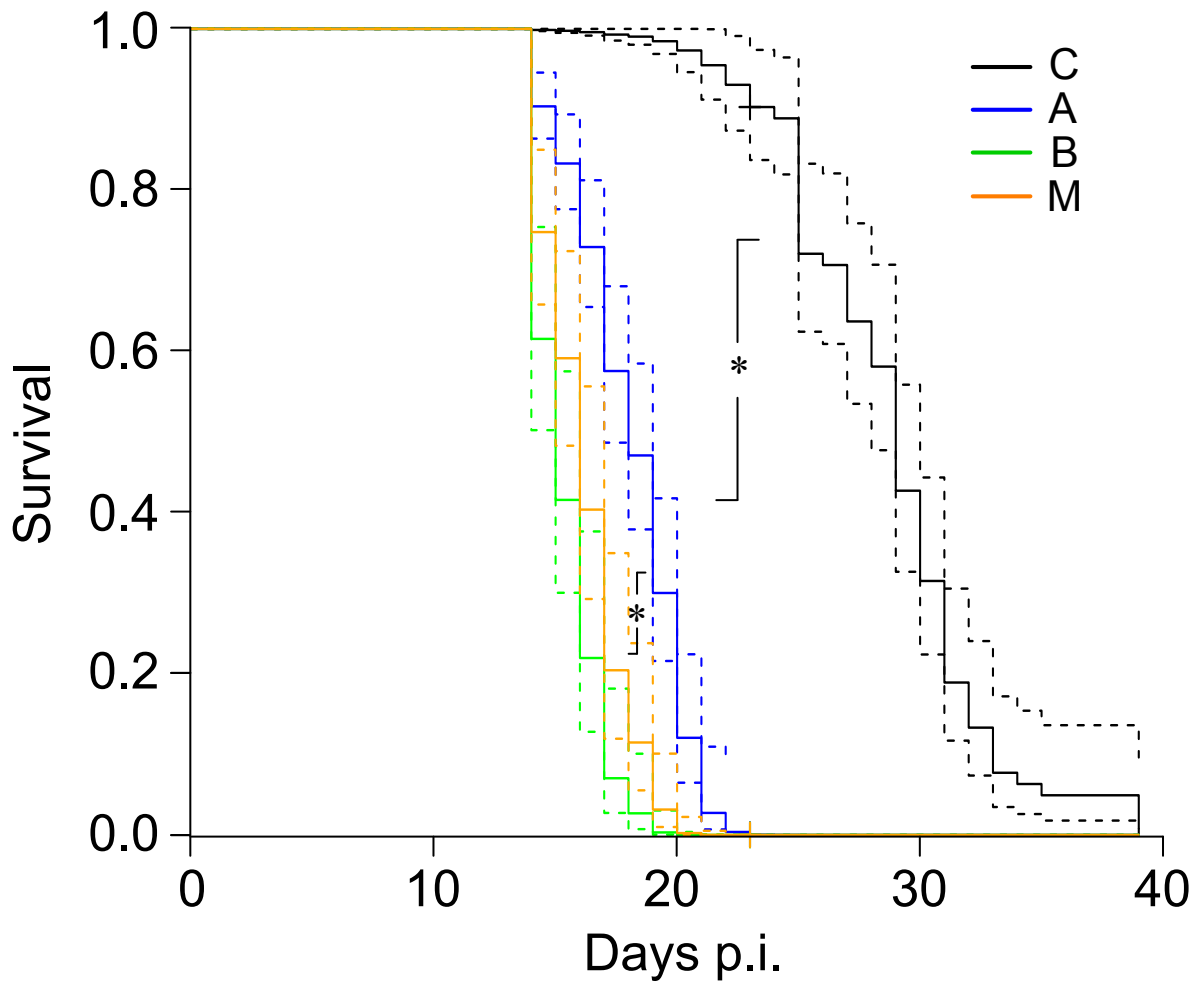

**Fig. S4.** Fitted Cox proportional hazard survival curves (solid coloured lines) of bees from 13 days p.i. onwards. C=Control (black); A=DWV-A (blue); B=DWV-B (green); M=Mix (orange) and 95% CIs for each fitted curve (dashed coloured lines). Star/lines show significant differences between treatments ( $P < 0.05$ ) based on post-hoc pairwise comparisons of the final model in Table S6.



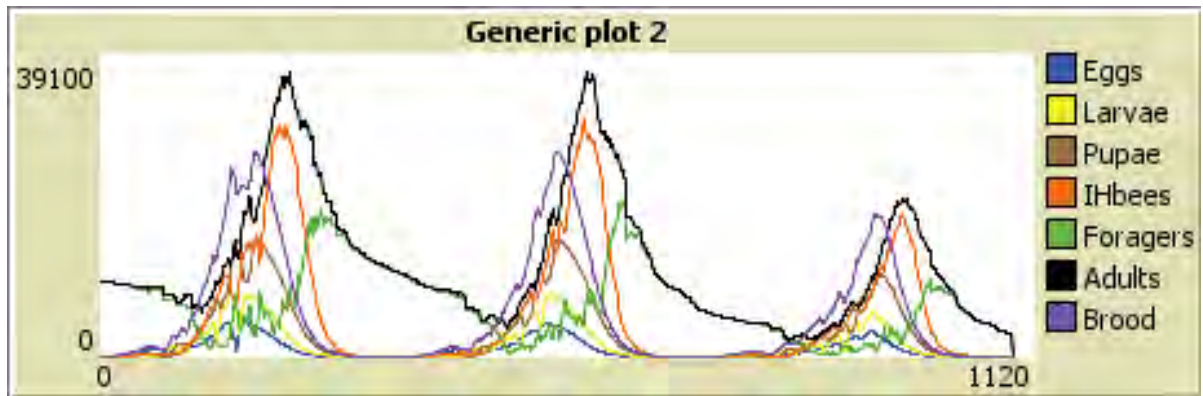

**Fig. S5.** Population dynamics over time of colonies infected with DWV-B, with modifications only to the relative individual mortality of adult bees: the individual daily mortality rate of pupae was kept at the default setting (Table S5). The model was run in BEEHAVE [48]

**Table S1.** (A) Virus loads (as genome equivalents) of A and B inocula used to calculate infectious dose. Virus loads (qRT-PCR) from cage experiment individuals sampled at 9d p.i. (B) and 13d p.i. (B). Ct values transformed into virus genome equivalents per honeybee are shown.

**A.**

INOCULA

| DWV-B    |                        | DWV-A    |                          |
|----------|------------------------|----------|--------------------------|
| Ct value | Q / genomes / ul       | Ct value | Q / genomes / ul         |
| 15.1     | 6.97 x 10 <sup>8</sup> | 13.46    | 1.18 x 10 <sup>9</sup> § |

§ The A inoculum was diluted x1.69 relative to the B inoculum to equalize doses. This is consistent with the proportion of DWV-A reads compared to DWV-B reads in the illumina-sequenced A and B inocula, respectively (Table S2.)

**B.**

9 DAYS P.I.

| Treatment | Sample | DWV-B        |                   | DWV-A        |                   | RP49<br>Ct value |
|-----------|--------|--------------|-------------------|--------------|-------------------|------------------|
|           |        | Ct value     | Absolute quantity | Ct value     | Absolute quantity |                  |
| C         | C1     | na           | na                | <b>37.69</b> |                   | 24.99            |
|           | C2     | na           | na                | <b>37.30</b> |                   | 24.43            |
|           | C3     | na           | na                | na           | na                | 24.05            |
|           | C4     | na           | na                | <b>37.62</b> |                   | 24.27            |
|           | C5     | na           | na                | <b>37.74</b> |                   | 24.81            |
| A         | D1     | <b>36.05</b> |                   | 11.96        | 176569565921.80   | 25.09            |
|           | D2     | na           | na                | 11.10        | 414617806383.81   | 24.37            |
|           | D3     | <b>36.39</b> |                   | 11.14        | 212221814165.47   | 24.03            |
|           | D4     | 35.16        | 18916.76          | 11.56        | 302548758497.88   | 24.33            |
|           | D5     | na           | na                | 12.08        | 99653859170.76    | 24.68            |
| B         | V1     | 10.08        | 2920480607485.87  | 34.50        | 120113.93         | 26.43            |
|           | V2     | 9.17         | 2901401640057.17  | <b>35.51</b> |                   | 26.04            |
|           | V3     | 9.35         | 2820652080550.68  | 31.60        | 496756.50         | 25.37            |
|           | V4     | 9.88         | 1280784021269.72  | 33.81        | 73550.91          | 25.38            |
|           | V5     | 9.27         | 6424227863871.44  | 32.75        | 498041.52         | 25.43            |
| M         | M1     | 10.10        | 1645366097189.03  | 10.81        | 504504218346.07   | 25.82            |
|           | M2     | 9.95         | 4607122304117.58  | 10.38        | 1699703416392.77  | 25.48            |
|           | M3     | 10.40        | 2949987704299.03  | 11.51        | 692417826596.36   | 26.27            |
|           | M4     | 10.16        | 2897697469151.58  | 10.81        | 925610286072.58   | 25.42            |
|           | M5     | 9.80         | 3892980228102.32  | 10.41        | 1285922177392.84  | 25.55            |

***Bold italic*** Ct values > acceptance threshold (Ct = 35). na = not detected

**Table S1. Cont.**

**C.**

13 DAYS P.I.

| Treatment | Sample | DWV-B    |                   | DWV-A    |                   | RP49     |
|-----------|--------|----------|-------------------|----------|-------------------|----------|
|           |        | Ct value | Absolute quantity | Ct value | Absolute quantity | Ct value |
| C         | C6     | na       | na                | na       | na                | 24.48    |
|           | C7     | na       | na                | na       | na                | 24.32    |
|           | C8     | na       | na                | na       | na                | 23.99    |
| A         | D6     | na       | na                | 10.26    | 195511930427.82   | 25.37    |
|           | D7     | na       | na                | 9.96     | 683595893151.01   | 25.19    |
|           | D8     | na       | na                | 9.87     | 391146603892.63   | 24.48    |
| B         | V6     | 10.86    | 396656612110.95   | na       | na                | 25.30    |
|           | V7     | 10.99    | 566967760401.87   | na       | na                | 25.49    |
|           | V8     | 11.01    | 1116755448574.56  | na       | na                | 25.75    |
| M         | M6     | 12.04    | 375004409986.09   | 10.85    | 406282317906.32   | 25.54    |
|           | M7     | 11.58    | 722585275438.26   | 10.09    | 962219268280.72   | 24.90    |
|           | M8     | 12.37    | 355406511228.20   | 10.68    | 533357594158.83   | 25.50    |

na = not detected

**Table S2.** Origin of sequenced reads in the DWV-A and -B inocula (see Supplementary Methods for detailed description of methods).

| Origin              | B inoculum reads (M2) | A inoculum reads (M1) |
|---------------------|-----------------------|-----------------------|
| <i>Apis</i>         | 15,277,458 (74.5%)    | 8,545,289 (44.2%)     |
| Viruses             |                       |                       |
| DWV-B               | 4,547,491 (22.2%)     | 623 (0.0032%)         |
| DWV-A               | 6,157 (0.03%)         | 10,334,080 (53.5%)    |
| Overhead            |                       |                       |
| phiX                | 26,355 (0.13%)        | 28,010 (0.14%)        |
| sequencing adapters | 3,555 (0.017%)        | 4,327 (0.022%)        |
| low complexity      | 602,276 (2.9%)        | 405,663 (2.1%)        |
| Unknown             | 47,587 (0.23%)        | 12,434 (0.064%)       |
| Total               | 20,510,879            | 19,330,426            |





**Table S4.** List of primers used in this study.

| Primer Target     | Name         | Sequence                  | Application  | Reference  |
|-------------------|--------------|---------------------------|--------------|------------|
| DWV-A (RdRp)      | DWV-F2       | TGTCTTCATTAAAGCCACCTGGAA  | qPCR         | [1]        |
| DWV-A (RdRp)      | DWV-R2a      | TTTCCTCATTAAGTGTGTCGTTGAT | qPCR         | "          |
| DWV-B (RdRp)      | VDV-F2       | TATCTTCATTAAAACCGCCAGGCT  | qPCR         | "          |
| DWV-B (RdRp)      | VDV-R2a      | CTTCCTCATTAAGTGTGTCGTTGTC | qPCR         | "          |
| DWV-A (RdRp)      | F8668        | TTCATTAAAGCCACCTGGAACATC  | qPCR         | [2]        |
| DWV-A (RdRp)      | B8757        | TTTCCTCATTAAGTGTGTCGTTGA  | qPCR         | "          |
| DWV-A (RdRp)      | DWV-F1a      | GGAAACATCTGGAATTAGCGACAAA | Stand' curve | [1]        |
| DWV-B (RdRp)      | VDV-F1a      | GAAAACATTTGGAATTAGCAACGAC | Stand' curve | "          |
| DWV-A / -B (RdRp) | DWVDV-7A-R   | AATCCGTGAATATAGTGTGAGG    | Stand' curve | "          |
| SBPV              | SPV-F3177    | GCGCTTTAGTTCAATTGCC       | qPCR         | [3]        |
| SBPV              | SPV-B3363    | ATTATAGGACGTGAAAATATAC    | qPCR         | "          |
| SBPV              | SBPV-var-F2  | GTGCTTTAGTTCAATTACCATTG   | qPCR         | This study |
| SBPV              | SBPV-var-R   | ATTATGGGACGTGAGAAT ATAC   | qPCR         | This study |
| ABPV              | ABPV-F6548   | TCATACCTGCCGATCAAG        | qPCR         | [4]        |
| IAPV              | IAPV-F6627   | CCATGCCTGGCGATTAC         | qPCR         | "          |
| ABPV/IAPV         | KIABPV-B6707 | CTGAATAATACTGTGCGTATC     | qPCR         | "          |
| BQCV              | BQCV-F7893   | AGTGGCGGAGATGTATGC        | qPCR         | [1]        |
| BQCV              | BQCV-B8150   | GGAGGTGAAGTGGCTATATC      | qPCR         | "          |
| SBV               | SBV-F3164    | TGGAACTACGCATTCTCTG       | qPCR         | "          |
| SBV               | SBV-B3461    | GCTCTAACCTCGCATCAAC       | qPCR         | "          |
| RP49              | RP49-qF      | AAGTTCATTCGTCACCAGAG      | qPCR         | [2]        |
| RP49              | RP49-qB      | CTCCAGTTCCTTGACATTATG     | qPCR         | "          |

**Table S4. References**

- 1 McMahon, D.P., Fuerst, M.A., Caspar, J., Theodorou, P., Brown, M.J.F., Paxton, R.J. A sting in the spit: widespread cross-infection of multiple RNA viruses across wild and managed bees. *J Anim Ecol* 83, doi:10.1111/1365-2656.12345 (2015).
- 2 Forsgren, E., de Miranda, J.R., Isaksson, M., Wei, S., and Fries, I. Deformed wing virus associated with *Tropilaelaps mercedesae* infesting European honey bees (*Apis mellifera*). *Exp Appl Acarol* 47, 87-97 (2009).
- 3 de Miranda, J.R. et al. Genetic characterization of slow bee paralysis virus of the honeybee (*Apis mellifera* L.). *J Gen Virol* 91, 2524-2530 (2010).
- 4 de Miranda, J.R., Cordonni, G., and Budge, G. The Acute bee paralysis virus-Kashmir bee virus-Israeli acute paralysis virus complex. *J Invertebr Pathol* 103

**Table S5.** Description of adjusted BEEHAVE model parameters. Modified values are emphasized in underlined italics.

Model scenario (1) DWV-A.

| <b>Parameter</b>                   | <b>Parameter value</b> | <b>Default value</b> | <b>Description</b>                                                    |
|------------------------------------|------------------------|----------------------|-----------------------------------------------------------------------|
| MORTALITY_INHIVE                   | 0.004                  | 0.004                | Daily mortality rate of healthy in-hive bees and foragers             |
| MORTALITY_INHIVE_INFECTED_AS_ADULT | 0.012                  | 0.012                | Daily mortality rate of in-hive bees and foragers, infected as adults |
| MORTALITY_INHIVE_INFECTED_AS_PUPAE | 0.012                  | 0.012                | Daily mortality rate of in-hive bees and foragers, infected as pupae  |

Model scenario (2) DWV-B

| <b>Parameter</b>                   | <b>Parameter value</b> | <b>Default value</b> | <b>Description</b>                                                    |
|------------------------------------|------------------------|----------------------|-----------------------------------------------------------------------|
| MORTALITY_INHIVE                   | 0.004                  | 0.004                | Daily mortality rate of healthy in-hive bees and foragers             |
| MORTALITY_INHIVE_INFECTED_AS_ADULT | <u>0.016</u>           | 0.012                | Daily mortality rate of in-hive bees and foragers, infected as adults |
| MORTALITY_INHIVE_INFECTED_AS_PUPAE | <u>0.016</u>           | 0.012                | Daily mortality rate of in-hive bees and foragers, infected as pupae  |

Conservative model scenario (2) DWV-B

| <b>Parameter</b>                   | <b>Parameter value</b> | <b>Default value</b> | <b>Description</b>                                                    |
|------------------------------------|------------------------|----------------------|-----------------------------------------------------------------------|
| MORTALITY_INHIVE                   | 0.004                  | 0.004                | Daily mortality rate of healthy in-hive bees and foragers             |
| MORTALITY_INHIVE_INFECTED_AS_ADULT | <u>0.016</u>           | 0.012                | Daily mortality rate of in-hive bees and foragers, infected as adults |
| MORTALITY_INHIVE_INFECTED_AS_PUPAE | 0.012                  | 0.012                | Daily mortality rate of in-hive bees and foragers, infected as pupae  |



**Table S6.** Final Cox proportional hazard model of cage mortality following experimental inoculation, from day 13 p.i. onwards. C, control; A, DWV-A; B, DWV-B; M, mixed DWV-A and -B. SE, Standard error; SD, Standard deviation. <sup>a</sup> Equivalent to the hazard ratio, the instantaneous risk of death for bees in each treatment compared with the baseline treatment level (in this case C). Higher levels of  $\beta$  indicate higher risk of death.

| Parameters      | Coefficients |                |                              | Model testing  |    |           |
|-----------------|--------------|----------------|------------------------------|----------------|----|-----------|
|                 | $\beta$      | SE ( $\beta$ ) | Exp ( $\beta$ ) <sup>a</sup> | $\chi^2$ (LRT) | df | P-value   |
| Fixed variable  |              |                |                              |                |    |           |
| Treatment       |              |                |                              | 43.102         | 3  | <0.00001* |
| C               | 0            | -              | 1                            |                |    |           |
| A               | 4.742        | 0.671          | 114.642                      |                |    |           |
| B               | 6.464        | 0.708          | 641.819                      |                |    |           |
| M               | 6.061        | 0.698          | 428.914                      |                |    |           |
| Random variable |              |                |                              |                |    |           |
| Cage            | SD           | Variance       |                              |                |    |           |
|                 | 0.542        | 0.293          |                              |                |    |           |
